# Supplementary material
Source: HighWire-hosted journal article supplement (https://bmjopen.bmj.com/content/12/3/e056472)
Supplement: inline-supplementary-material-1 [file inline-supplementary-material-1.pdf]

## Supplemental Material A

### Questionnaire Worker

#### ATTRIBUTES OF COMMUNITY ORGANISATIONS

- What are your views about community organisations?
- How do you think community organisations can help address work-related mental injury?
- What is it about community organisations that would make them appealing to you as a mental health literacy program provider?

#### EXPERIENCES WITH COMMUNITY ORGANISATIONS

- What can you tell me about your experiences or involvement with such organisations?

#### BEHAVIOURAL BELIEFS

- What do you believe to be the advantages of participating in mental health literacy programs delivered by community organisations, should you have any work-related mental health concerns?
- What do you believe to be the disadvantages of participating in these community-based programs?

#### NORMATIVE BELIEFS

- Which individuals within your personal/social and work networks do you think would approve of you participating in mental health literacy programs delivered by community organisations, should you have any work-related mental health concerns?
- Which individuals would disapprove of you participating in these community-based programs?

#### CONTROL BELIEFS

- What would make it easier for you to participate in mental health literacy programs delivered by community organisations to address work-related mental health concerns?
- What would prevent you from participating in these community-based programs?
