# Supplementary material
Source: HighWire-hosted journal article supplement (https://bmjopen.bmj.com/content/12/3/e056472)
Supplement: inline-supplementary-material-2 [file inline-supplementary-material-2.pdf]

## **Supplemental Material B**

### *Questionnaire Manager*

#### **ATTRIBUTES OF COMMUNITY ORGANISATIONS**

- What are your views about community organisations?
- How do you think community organisations can help address work-related mental injury?
- What is it about community organisations that would make them appealing to you as a mental health literacy program provider?
- Would you be supportive of a community-based approach to work-related mental injury prevention? Why?

#### **EXPERIENCES WITH COMMUNITY ORGANISATIONS**

- What can you tell me about your experiences or involvement with such organisations?
